1 Interplay between *TERT* promoter mutations and methylation culminates in  
2 chromatin accessibility and *TERT* expression

3

4 **Short title:** High-order chromatin structure and *TERT* transcriptional regulation

5

6 Catarina Salgado<sup>1</sup>, Celine Roelse<sup>1</sup>, Rogier Nell<sup>2</sup>, Nelleke Gruis<sup>1</sup>, Remco van Doorn<sup>1</sup>, Pieter  
7 van der Velden<sup>2\*</sup>.

8

9 <sup>1</sup>Department of Dermatology, Leiden University Medical Center, Leiden, The Netherlands;

10 <sup>2</sup>Department of Ophthalmology, Leiden University Medical Center, Leiden, The Netherlands

11

12 \*Corresponding author: P.A.van\_der\_Velden@lumc.nl

13

## 14 **Abstract**

15 The *telomerase reverse transcriptase* (*TERT*) gene is responsible for telomere maintenance in  
16 germline and stem cells, and is re-expressed in 90% of human cancers. Contrary to common  
17 concepts, CpG methylation in the *TERT* promoter (*TERTp*), was correlated with *TERT* mRNA  
18 expression. Furthermore, two hotspot mutations in *TERTp*, dubbed C228T and C250T, have been  
19 revealed to assist binding of transcription factor ETS/TCF and subsequent *TERT* expression. This  
20 study aimed to elucidate the combined contribution of epigenetic (promoter methylation and  
21 higher-order chromatin structure) and genetic (promoter mutations) mechanisms in regulating  
22 *TERT* gene expression in healthy skin and in melanoma cell lines (n=61). We unexpectedly  
23 observed that the methylation of *TERTp* was as high in a subset of healthy skin cells, mainly  
24 keratinocytes, as in cutaneous melanoma cell lines. In spite of the high promoter methylation  
25 fraction in wild-type (WT) samples, *TERT* mRNA was only expressed in the melanoma cell lines  
26 with high methylation or intermediate methylation in combination with *TERT* mutations. *TERTp*  
27 methylation was positively correlated with chromatin accessibility and expression in 8 melanoma  
28 cell lines. Cooperation between epigenetic and genetic mechanisms were best observed in  
29 heterozygous mutant cell lines as chromosome accessibility preferentially concerned the mutant  
30 allele. Combined, these results suggest a complex model in which *TERT* expression requires  
31 either a widely open chromatin state throughout the promoter in *TERTp*-WT samples due to high  
32 methylation or a combination of moderate methylation fraction/chromatin accessibility in the  
33 presence of the C228T/C250T mutations.

## 34 **Keywords**

35 Regulation, *TERT*, chromatin accessibility, genetics, epigenetics

## 36 **Author summary**

37 PvdV and RvD formulated research goals and aims and supervised the overall progress. Wet-lab  
38 experiments, preparation of the manuscript and statistical analysis were performed by CS and CR.  
39 CS designed the novel assays. RN was involved in the experimental setup. RvD, NG and PvdV  
40 were responsible for funding acquisition. CR, RN, NG, RvD and PvdV critically reviewed the  
41 manuscript.

## 42 **Introduction**

43 Approximately 90% of all human cancers share a transcriptional alteration: reactivation of the  
44 telomerase reverse transcriptase (*TERT*) gene [1, 2]. *TERT* encodes the catalytic subunit of the  
45 ribonucleoprotein telomerase and is capable of extending the repetitive, non-coding DNA  
46 sequence on terminal ends of chromosomes, the telomeres. As the single-stranded 5' ends of  
47 chromosomes are shortened with each cellular division, telomeres prevent loss of coding  
48 chromosomal DNA [3-6]. Telomerase is only transcribed in a subset of stem cells in growing or  
49 renewing tissues, but through reactivation of telomerase expression, cells can extend telomeres or  
50 prevent telomeres shrinkage. This is termed telomere maintenance, which is one of the hallmarks  
51 of cancer, and allows subsequent indefinite proliferation and immortalization [3, 6-8].

52 Since the *MYC* oncogene has firstly been identified to activate telomerase, a variety of epigenetic  
53 or genetic mechanisms in the gene body or *TERT* promoter (*TERTp*) have followed, such as CpG  
54 methylation, histone modifications, mutations, germline genetic variations, structural variations,  
55 DNA amplification or chromosomal rearrangements [3, 5, 7].

56 A widely investigated mechanism that could induce *TERT* reactivation is the presence of  
57 mutations in the gene promoter [7, 9]. Horn and Huang *et al.* identified two mutually exclusive  
58 *TERTp* point mutations that are correlated to *TERT* mRNA expression by creating binding motifs  
59 for the transcription factor E26 transformation-specific/ternary complex factor (ETS/TCF) [7, 9].  
60 These mutations, chr5:1,295,228 C>T (-124 bp from the transcription start site) and

61 chr5:1,295,250 C>T in hg19 (−146 bp from TSS), henceforth respectively dubbed C228T and  
62 C250T, were first identified in melanoma. Furthermore, these mutations showed high prevalence  
63 in and were correlated with poor prognosis of cutaneous melanomas [4, 5, 10-12].  
64 An additional mechanism by which a gene can be made accessible to transcription factors,  
65 facilitating gene expression, is hypomethylation of promoter CpG islands, a hallmark of  
66 euchromatin [13, 14]. Methylation located in the gene body, however, shows a positive  
67 correlation with active gene expression [15]. In stark contrast to most genes, *TERT*<sub>p</sub>  
68 hypermethylation may also allow gene expression since transcriptional repressors rely on  
69 unmethylated promoter CpGs, such as CCCTC-binding factor (CTCF)/cohesin complex or MAZ  
70 [16-18]. As such, in combination with transcription factor binding, dissociation of the repressor  
71 may result in *TERT* expression [3, 16, 19, 20]. Castelo-Branco *et al.* proposed that methylation of  
72 a specific CpG site in *TERT*<sub>p</sub>, cg11625005 (position 1,295,737 in hg19) was associated with  
73 paediatric brain tumours progression and poor prognosis [20]. This finding was later supported by  
74 the study from Barthel *et al.*, in which the CpG methylation was found to be correlated with  
75 *TERT* expression in samples lacking somatic *TERT* alterations and to be generally absent in  
76 normal samples adjacent to tumour tissue [3].  
77 Chromatin organisation, its plasticity and dynamics at *TERT*<sub>p</sub> region have been reported as  
78 relevant players in regulation of gene expression by influencing the binding of transcription  
79 factors [21, 22]. Cancer cells are positively selected to escape the native repressive chromatin  
80 environment in order to allow *TERT* transcription [23].  
81 In the present study, we aim to elucidate the interaction of genetic and epigenetic mechanisms in  
82 regulation of *TERT*<sub>p</sub>. We approach this by using novel droplet digital PCR (ddPCR)-based assays  
83 [24]. Human-derived benign skin cells (keratinocytes, dermal fibroblasts, melanocytes, skin  
84 biopsy samples and naevi) and melanoma cell lines were analyzed. The *TERT*<sub>p</sub> mutational status  
85 was assessed along with the absolute presence of methylation in the *TERT*<sub>p</sub> at a CpG-specific

86 resolution. The effect of chromatin accessibility in *TERT* expression was evaluated in a subset of  
87 cultured melanoma cell lines.

## 88 **Results**

### 89 **NGS-based deep bisulfite sequencing and development of a ddPCR assay to assess**

#### 90 ***TERT*<sub>p</sub> methylation fraction**

91 We first aimed to quantitatively measure the *TERT*<sub>p</sub> methylation at a CpG-specific resolution in  
92 primary skin samples and melanoma cell lines. DNA of 44 primary skin biopsy samples and  
93 melanoma cell lines was bisulfite-converted (BC) and analysed using NGS-based deep bisulfite  
94 sequencing to assess the methylation fraction (MF) in a region of *TERT*<sub>p</sub> encompassing 31 CpG  
95 sites. The *TERT*<sub>p</sub> MF was high in some healthy skin samples, such as normal skin (~30%), naevi  
96 (~30%) and cultured keratinocytes (~50%). In the latter group, in fact, the MF was as high as in  
97 cutaneous melanoma cell lines (Fig 1).

98 In order to validate the *TERT*<sub>p</sub> MF obtained through NGS in a quantitative manner, we have  
99 developed a ddPCR assay using methylation-sensitive restriction enzymes (MSREs) HgaI and  
100 AvaI, which recognise the CpG on position 1,295,737 (cg11625005) and 1,295,731 in hg19,  
101 respectively (Fig 2). Castelo-Branco *et al.* showed that methylation of the cg11625005 in *TERT*<sub>p</sub>,  
102 was associated with tumour progression and poor prognosis of childhood brain tumours [20].  
103 Barthel *et al.* affirmed a correlation between methylation and *TERT* expression in samples  
104 lacking somatic *TERT* alterations and a lower methylation level in normal samples [3]. Indeed, in  
105 our study, the MF of fibroblasts was as low as that of the unmethylated control DNA, whereas  
106 that of the keratinocytes was higher than most of the cutaneous melanoma cell lines (Fig 2B). The  
107 MF of cg11625005 (position 1,295,737) obtained through NGS and by ddPCR were highly  
108 correlated ( $R^2=0.8166$ ,  $P < 0.001$ ) (Fig 2C). The MF of 1,295,731 assessed through ddPCR even  
109 yielded a stronger correlation ( $R^2=0.9580$ ,  $P < 0.001$ ) (Fig 2D).

#### 110 **Absence of correlation between methylation fraction and *TERT* expression**

111 Cancer cells are commonly characterised by hypermethylation of promoter CpG islands resulting  
112 in repression of tumour suppressor genes. However, in *TERT*, promoter hypermethylation was  
113 found to be associated with higher expression, since CTCF repressors of *TERT* transcription do  
114 not bind methylated sequences [3, 16, 17, 19]. In our sample cohort, there was no correlation  
115 between *TERT* methylation of cg11625005 and mRNA expression (n=34, Fig 3 and an overview  
116 in Fig 7C).

### 117 **Evaluation of *TERT* mutations in a collection of skin samples and melanoma cell lines**

118 Besides promoter methylation, somatic mutations are also known to be correlated with *TERT*  
119 reactivation. Therefore, we characterised the *TERT* mutational status of the sample cohort.  
120 Sanger sequencing on one naevus, fresh skin and cutaneous melanoma cell lines 518A2, 607B,  
121 A375, 94.07 and 93.08 revealed melanoma-associated *TERT* C250T and C228T mutations (Fig  
122 4A). Aiming to use the ddPCR method to evaluate the mutational load of the samples, the *TERT*  
123 C250T and C228T mutation assays were validated in three samples of which the mutation was  
124 identified in sequencing analysis, 518A2, 607B and A375 (Fig 4B). Following the test runs, the  
125 C228T and C250T assays were used on the extended sample cohort (n=61) (S5 Table and Fig  
126 7D). All *TERT*-mutated samples were cutaneous melanoma cell lines, however OCM8 and  
127 94.13 cutaneous cell lines tested wild-type. The C250T mutation was not present in combination  
128 with the C228T mutation in any sample, confirming that the mutations are mutually exclusive.

### 129 **Absence of correlation between mutational status and *TERT* expression**

130 As the presence of mutations in the gene promoter induces *TERT* reactivation, we assessed the  
131 correlation between mutational status with *TERT* mRNA expression (n=34). When WT and  
132 mutated samples (either C228T or C250T) were compared, regardless of origin of the tissue, no  
133 significant differences for *TERT* mRNA expression were found (Fig 5). Moreover, *TERT*  
134 expression was exclusive to the melanoma cell lines, either with or without *TERT* mutations (Fig  
135 7C).

136 ***TERT* expression is correlated to chromatin accessibility**

137 In contrast to most genes, methylation of the *TERT*<sub>p</sub> positively correlates with its mRNA  
138 expression [3, 16, 17, 19]. Although we were not able to confirm this finding, we investigated  
139 whether besides promoter methylation, other mechanisms could contribute to chromatin  
140 accessibility to transcription factors affecting *TERT*<sub>p</sub> regulation. Therefore, we analysed  
141 chromatin state in a subset of melanoma cell lines (cutaneous, 518A2, 607B, 94.07, A375, 93.08  
142 and OCM8; and uveal, OMM2.5 and Mel270) by ddPCR methodology instead of qPCR for an  
143 accurate quantification. The positive control gene *GAPDH*, a housekeeping gene that is generally  
144 expressed in all conditions, and thus 100% accessible, was used. The accessibility in the region  
145 around cg11625005 shows a high variability, being over 90% in uveal cell lines while being  
146 intermediate to low in cutaneous melanoma cell lines (Fig 6A and an overview in Fig 7E and S6  
147 Table). When comparing the accessibility around cg11625005 to the methylation fraction of this  
148 CpG, a significant positive correlation was observed ( $R^2 = 0.89$ ,  $P < 0.001$ ) (Fig 6B). Another  
149 positive correlation ( $R^2 = 0.59$ ,  $P < 0.05$ ) was found when comparing the accessibility of the same  
150 region to the normalised *TERT* mRNA expression levels in these samples (Fig 6C). In actuality,  
151 in this subset of 8 cell lines, the *TERT*<sub>p</sub> methylation and gene expression show a statistically  
152 significant ( $P$ -value  $< 0.05$ ) positive correlation (Fig 6D). The 3 cell lines with higher MF are those  
153 with the highest chromatin accessibility (OMM2.5, Mel270 and OCM8). Remarkably, these are  
154 also the cell lines with WT-*TERT*<sub>p</sub>, in which the chromatin accessibility was significantly higher  
155 than in the mutated subgroup (Fig 6E).

156 In addition, we investigated whether the *TERT* accessibility originated from the mutant or the  
157 wildtype allele. For this purpose, we assessed the fractional abundance of mutated allele, in the  
158 subgroup of 4 *TERT*<sub>p</sub>-mutated cutaneous cell lines before and after nuclease digestion. 607B cell  
159 line was not included since it is homozygous for the mutation and not informative. Assuming that  
160 the nuclease digests DNA in open and accessible chromatin regions, the observed decrease in

161 mutation fractional abundance after digestion (Fig 6F) in all 4 cell lines suggest that mutated  
162 alleles were preferably digested over WT alleles.

## 163 **Discussion**

164 By using advanced quantification methods, we investigated the epigenetic and genetic regulation  
165 of *TERT*<sub>p</sub> in benign and malignant skin cells. Innovative ddPCR-based assays were developed  
166 and validated to assess *TERT* promoter methylation and chromatin accessibility. These methods  
167 overcome fallible bisulfite-conversion and avoid semi-quantitative qPCR and provide absolute  
168 quantification even in samples that are challenged by DNA concentration and integrity.  
169 The methylation fraction assessed by both NGS and ddPCR was high in a variety of normal  
170 samples, of which mainly keratinocytes exceeded levels of cutaneous melanoma cell lines. This is  
171 in contrast with previous investigations on brain tumours and skin melanoma that observed a  
172 general absence of cg11625005 methylation in normal cells [3, 20]. In our study, methylation of  
173 cg11625005 at position 1,295,737 did not stand out across the CpGs in *TERT*<sub>p</sub> but seemed to be  
174 affected along with other CpG's in the surrounding region in all samples (Fig 7B). This result  
175 suggests that context-related methylation around cg11625005 is biologically relevant in  
176 opposition to methylation of one specific CpG. Consistent with previous findings, the  
177 methylation of most samples gradually increased in the 5' direction and decreased near the  
178 transcription start site (TSS) of the *TERT* gene (Fig 7B) [19, 25]. Regardless of the methylation  
179 status, human-derived benign cells did not express *TERT* indicating that other epigenetic  
180 mechanisms are involved (Fig 8). In contrast, analysis of tumour cell lines revealed a wide variety  
181 of promoter methylation levels (5%-100% MF). *TERT* expression was found in all tumour cell  
182 lines with or without *TERT*<sub>p</sub> mutation.

183 A plethora of histone modifications result in chromatin remodelling that may change accessibility  
184 of the *TERT*<sub>p</sub> to transcription factors, such as ETS/TCF [7]. Therefore, we explored the higher-  
185 order chromatin state and its interaction with methylation levels and mRNA expression in 6



186 cutaneous and 2 uveal melanoma cell lines. We found that the gene accessibility around  
187 cg11625005 showed a positive correlation with the methylation and *TERT* mRNA expression in  
188 these samples.

189 We next investigated whether both wildtype and mutant *TERT* alleles were equally affected  
190 by higher order chromatin organization and assessed the mutational fraction upon digestion  
191 with nuclease, assuming that the nuclease only digests DNA in open and accessible  
192 chromatin regions. We could infer that, mutated alleles are more accessible, possibly favouring  
193 the binding of transcription factors, such as ETS/TCF, and consequently *TERT* expression of the  
194 mutant allele (Fig 8). The 94.07 cell line is an exception to the rule that still supports the  
195 dominant role of higher order chromatin organization since both alleles were equally resistant to  
196 nuclease digestion and presented with very low methylation fraction, explaining the lowest *TERT*  
197 expression levels among all cell lines. Our results are in line with the study from Stern *et al.* and  
198 Huang *et al.*, where the authors found that active mutant allele allows monoallelic *TERT*  
199 expression [25, 26].

200 Another remarkable observation in our study is that in WT *TERT*-expressing uveal melanoma cell  
201 lines, the methylation of the whole region surrounding cg11625005 is close to 100% with a  
202 significantly higher chromatin accessibility compared to *TERT*<sub>p</sub>-mutated cell lines with moderate  
203 methylation. In these cases, of *TERT*<sub>p</sub>-WT samples that show gene expression, we were not only  
204 able to confirm but also expand previous results, in which *TERT*<sub>p</sub> methylation carries out a non-  
205 canonical role, leading to transcriptional activation (Fig 8).

206 We conclude that ddPCR is a highly sensitive and quantifiable technique that can reliably assess  
207 methylation fractions and mutational status even in CG-rich sequences such as *TERT* gene.

208 Further investigation in primary melanoma is needed to assess whether *TERT* methylation is  
209 predictive of worse prognosis and at which methylation fraction this phenomenon occurs [25].

210 Thereafter, quantification of *TERT* methylation might be used for the assessment of patient  
211 prognosis, as it is readily applicable in the clinic. Although *TERT* is one of the most affected

212 genes in cancer, with its noncoding mutations cooperating with promoter methylation, further  
 213 investigation must be conducted to fully understand all epigenetic mechanisms that collectively  
 214 reactivate *TERT*.

## 215 **Material and Methods**

### 216 **Samples, DNA extraction and PCR**

217 Tissue samples were derived from anonymous patients and consisted of 11 normal skin samples,  
 218 6 frozen naevi, and low-passage cultured samples: 5 fibroblasts, 6 melanocytes and 8  
 219 keratinocytes. Primary human fibroblasts and keratinocytes were isolated from surplus human  
 220 breast skin as described before [27]. Keratinocytes were used at passage 2, while fibroblasts were  
 221 used at passage 3-5. The low-passage cultured fibroblasts, keratinocytes and melanocytes were a  
 222 kind gift from A. El Ghalbzouri and JJ Out-Luiting [27].

223 We also included 19 cutaneous and 6 uveal melanoma cell lines [28]. The batch thus consisted of  
 224 39 primary skin type samples and 25 melanoma cell lines, totalling 61 samples (Table 1). The  
 225 study was approved by the Leiden University Medical Center institutional ethical committee (05-  
 226 036) and was conducted according to the Declaration of Helsinki Principles.

227 **Table 1: Samples overview**

| Control samples     |             |             |               |          | Melanoma cell lines |         |
|---------------------|-------------|-------------|---------------|----------|---------------------|---------|
| Skin biopsy samples | Fibroblasts | Melanocytes | Keratinocytes | Naevi    | Cutaneous           | Uveal   |
| LB627               | F537        | m003        | K590          | Naevus 1 | 0401                | OMM 2.3 |
| LB470               | F544        | m002        | K409          | Naevus 2 | WM1368A             | OMM 1   |
| LB579               | F332        | m003A       | K549          | Naevus 3 | 93.05               | OMM 2.5 |
| LB576               | F334        | m004A       | K514          | Naevus 4 | WM3506              | Mel270  |
| LB584               | F628        | 0398A       | K060          | Naevus 5 | WM1960              | Mel202  |
| LB586               |             | HEM         | K627          | Naevus 6 | Meljuso             | 92.1    |
| LB625               |             |             | K516          |          | 634                 |         |
| LB381               |             |             | K550          |          | OCM8                |         |
| LB628               |             |             |               |          | OCM1                |         |
| LB629               |             |             |               |          | 518A2               |         |
| Fresh skin 1        |             |             |               |          | 607B                |         |
|                     |             |             |               |          | 94.07               |         |
|                     |             |             |               |          | A375                |         |
|                     |             |             |               |          | 93.08               |         |
|                     |             |             |               |          | 94.13               |         |
|                     |             |             |               |          | 01.05               |         |
|                     |             |             |               |          | 04.04               |         |

|  |  |  |  |  |       |     |
|--|--|--|--|--|-------|-----|
|  |  |  |  |  | MM157 | 228 |
|  |  |  |  |  | 06.24 | 229 |

230

231

232

233

234

235

236

237

238

239 DNA was isolated using the QIAamp DNA Blood Mini Kit and the DNeasy Blood & Tissue Kit  
240 (both from Qiagen, Hilden, Germany).

241 Conventional PCR was performed using the PCR-sequencing kit (Thermo Fisher  
242 Scientific, Waltham, MA, USA), containing 10X reaction buffer, MgCl<sub>2</sub> (50mM), dNTP mix  
243 (10nM, Fermentas/Thermo Fisher Scientific), primer mix (900nM each), Platinumx Taq enzyme  
244 (2.5U), 50ng DNA and Aqua B. Braun RNase-free water. A PCR for CG-rich sequences was  
245 performed on 50ng DNA using the PCRx Enhancer System (Thermo Fisher Scientific),  
246 containing 10X PCRx amplification buffer, MgSO<sub>4</sub> (50mM), dNTP mix (10nM), primer mix  
247 (900nM each), Platinumx Taq enzyme (2.5U) and Aqua B. Braun RNase-free water. The samples  
248 were amplified in C1000 Touch Thermal Cycler (Bio-Rad Laboratories, Inc., Hercules, CA,  
249 USA).

## 250 **Promoter methylation determination**

### 251 **Bisulfite conversion and next-generation sequencing (NGS)-based deep bisulfite**

252 **sequencing.** DNA was bisulfite-converted (BC) using the EZ DNA Methylation™ Kit (Zymo  
253 Research, Irvine, CA, USA) according to the manufacturer protocol (version 1.2.2).

254 BC samples were amplified using the PCR<sub>x</sub> Enhancer System in the program: 1 cycle of 95°C for  
255 3 minutes, 8 cycles of 95°C for 30 seconds, 58°C for 30 seconds, reducing 1°C/cycle, and 68°C  
256 for 1 minute, then 36 cycles of 95°C and 53°C for 30 seconds each, and 68°C for 1 minute,  
257 followed by 1 cycle of 68°C for 3 minutes. Tailed primers were used for amplification (900nM  
258 each; S1 Table). Samples were sequenced through next-generation sequencing (NGS), MiSeq,  
259 2x300bp paired-end, at Leiden Genome Technology Centre (LGTC).

## 260 **Novel design of a ddPCR assay using methylation-sensitive restriction enzymes**

261 **(MSREs) to determine *TERT* methylation fraction.** The methylation fraction (MF) of the  
262 CpG (cg11625005) in position 1,295,737 was determined by an in-house designed ddPCR assay  
263 in combination with HgaI methylation-sensitive restriction enzyme (MSRE) that cleaves this CpG  
264 when unmethylated, as described by Nell *et al.* [24]. 100ng DNA sample was incubated with  
265 HgaI (2U/μl) and appurtenant 10X NEBuffer 1.1 (both from New England Biolabs, Bioké,  
266 Leiden, The Netherlands) for 60 minutes at 37°C and 65°C for 20 minutes. To assess the MF of a  
267 CpG adjacent to cg11625005, located in 1,295,731, the MSRE AvaI (10U/μl; New England  
268 Biolabs) was employed, which recognises this CpG and cleaves it when unmethylated. Incubation  
269 of the DNA samples with AvaI was performed with 10X CutSmart buffer for 15 minutes at 37°C  
270 and subsequently 65°C for 20 minutes. For ddPCR reaction, 60ng DNA digested or undigested by  
271 HgaI, 2x ddPCR SuperMix for Probes (no dUTP), primers (900nM each), a FAM-labelled in-  
272 house-designed probe for the CpG site of interest (250nM, Sigma, St. Louis, MO, USA), and 20X  
273 HEX-labelled CNV *TERT* reference primer/probe (Bio-Rad) for total *TERT* amplicon count. The  
274 primer and probe sequences are presented in S2 Table. The amplification protocol used: 1 cycle  
275 of 95°C for 10 minutes, 40 cycles of 94°C for 30 seconds and 60°C for 1 minutes, and 1 cycle of  
276 98°C for 10 minutes, all at ramp rate 2°C/s. Droplets were analysed through a QX200 droplet  
277 reader (Bio-Rad) using QuantaSoft software version 1.7.4 (Bio-Rad). Raw data was uploaded in  
278 online digital PCR management and analysis application Roodcom WebAnalysis (version 1.4.2,

279 <https://www.roodcom.nl/webanalysis/>) [24], in which the MF was calculated by dividing the  
280 CNV of the digested sample with that of the paired undigested sample.

### 281 **Assessment of mutational status**

282 **Sanger sequencing.** The presence of the C228T and C250T *TERT*<sub>p</sub> mutations in some samples  
283 was evaluated by conventional Sanger sequencing. DNA samples were amplified through the  
284 PCR<sub>x</sub> Enhancer System (Thermo Fisher Scientific) using primers (Sigma-Aldrich) and  
285 amplification program described by McEvoy *et al.* [29].

286 **Mutation analysis using commercial TERT C250T and C228T mutation assays.** For most  
287 of the samples, the *TERT*<sub>p</sub> mutations were detected by the ddPCR technique according to  
288 protocol described by Corless *et al.* [30], using the *TERT* C250T\_113 Assay and C228T\_113  
289 Assay (unique assay ID dHsaEXD46675715 and dHsaEXD72405942, respectively; Bio-Rad).  
290 Both assays include FAM-labelled probes for the C250T and C228T mutations respectively,  
291 HEX-labelled wild-type (WT) probes, and primers for a 113-bp amplicon that encompasses the  
292 mutational sites. The ddPCR reaction mix comprised 1X ddPCR Supermix for Probes (No  
293 dUTP), Betaine (0.5M; 5M stock), EDTA (80mM; 0.5M stock, pH 8.0, Thermo Fisher  
294 Scientific), CviQI restriction enzyme (RE; 2.5U; 10U/μl stock, New England BioLabs), the *TERT*  
295 assay, and 50ng DNA. Droplets were generated in QX200 AutoDG system (Bio-Rad) and  
296 amplified in T100 Thermal Cycler (Bio-Rad) according to the recommended cycling conditions  
297 and analysed through a QX200 droplet reader (Bio-Rad) using QuantaSoft software version  
298 1.7.4.0917 (Bio-Rad).

### 299 **Chromatin accessibility**

300 **Cell culture and treatment to assess chromatin states.** Cutaneous melanoma cell lines A375,  
301 518A2, 607B, 94.07, 93.08, OMM2.5, Mel270 and OCM8 were cultured for 22 days in 9-cm  
302 Cellstar® cell culture dishes (Greiner Bio-One GmbH, Frickenhausen, Germany) with

303 Dulbecco's modified eagle medium (DMEM; Sigma-Aldrich) supplemented with 10% FCS,  
304 Penicillin (100U/ml), and Streptomycin (100µg/ml; both from Lonza, Verviers, Belgium) until  
305 roughly 95% confluent. Then, different densities (10,000, 20,000, 40,000 and 80,000 cells) of the  
306 above-mentioned cell lines were seeded in duplicate into a 48-well plate (Corning Costar, Sigma-  
307 Aldrich) required for the EpiQ chromatin assay. The EpiQ™ Chromatin Analysis Kit (Bio-Rad)  
308 was performed according to manufacturer's instructions. Briefly, after 2 days each cell line was  
309 85%-95% confluent. The cells were permeabilised and treated with EpiQ chromatin digestion  
310 buffer with or without nuclease for 1 hour at 37°C. Following incubation with EpiQ stop buffer  
311 for 10 minutes at 37°C, the DNA samples were purified using alcohol and DNA low- and high-  
312 stringency wash solutions. The genomic DNA was eluted in DNA elution solution.

313 **Novel design of a ddPCR assay to assess chromatin opening state.** The analysis was  
314 performed using ddPCR rather than qPCR, to achieve quantifiable results using *GAPDH*  
315 expression as positive control. The reaction mix consisted of 2x ddPCR Supermix for Probes (No  
316 dUTP, Bio-Rad), 20x HEX-labelled CNV *TERT* reference primer/probe (Bio-Rad), 50ng DNA,  
317 and primers (900nM each) and FAM-labelled probes (250nM) for *GAPDH*, or the methylation  
318 region around cg11625005 (S3 Table). Samples were amplified according to the program of the  
319 CNV *TERT* reference primer/probe as described. Gene accessibility was quantified by the  
320 digestion fraction between the digested and undigested samples, subtracted from 1.

### 321 **RNA isolation, cDNA synthesis and quantitative real-time PCR**

322 RNA was obtained using the FavorPrep Tissue Total RNA Extraction Mini Kit (Favorgen  
323 Biotech, Vienna, Austria) according to manufacturer's instructions for animal cells. cDNA was  
324 synthesised through the iScript™ cDNA Synthesis Kit (Bio-Rad) according to recommended  
325 protocol. *TERT* mRNA expression was assessed by qPCR performed with 3.5ng DNA, IQ SYBR  
326 Green Supermix (2x; Bio-Rad), and 0.5µM PCR primers (Sigma-Aldrich; S4 Table) in a Real-  
327 Time PCR Detection System CFX96 (Bio-Rad) and normalised to reference gene expression

328 (*RPS11*, *TBP* and *CPSF6*, S4 Table). Data was analysed through the  $\Delta\Delta$ CT method in Bio-Rad  
329 CFX manager software (version 3.1, Bio-Rad).

### 330 **Statistical Analysis**

331 MF obtained using ddPCR was calculated with 95% confidence interval through RoodCom  
332 WebAnalysis (version 1.4.2). Significant testing of linear regression and multiple comparisons in  
333 correlation plots was performed through GraphPad Prism (version 8 for Windows, GraphPad  
334 Software, CA, USA).

335 **Acknowledgements**

336 We thank Mieke Versluis, Wim Zoutman, AG Jochemsen and Mijke Visser for useful  
337 discussions. We would like to thank Coby Out and Tim van Groningen for the assistance with  
338 cell culturing.

339 **Funding**

340 This project has received funding from the European Union's Horizon 2020 research and  
341 innovation programme under the Marie Skłodowska-Curie grant agreement No. 641458.  
342 R.Nell is supported by the European Union's Horizon 2020 research and innovation program  
343 under grant agreement No 667787 (UM Cure 2020 project).

344 **Competing interests**

345 The authors report no conflict of interest.



## 346 References

- 347 1. Holt SE, Wright WE, Shay JW. Multiple pathways for the regulation of telomerase activity.  
348 *European journal of cancer* (Oxford, England : 1990). 1997;33(5):761-6.
- 349 2. Shay JW, Bacchetti S. A survey of telomerase activity in human cancer. *European journal of*  
350 *cancer* (Oxford, England : 1990). 1997;33(5):787-91.
- 351 3. Barthel FP, Wei W, Tang M, Martinez-Ledesma E, Hu X, Amin SB, et al. Systematic  
352 analysis of telomere length and somatic alterations in 31 cancer types. *Nature genetics*.  
353 2017;49(3):349-57.
- 354 4. Heidenreich B, Kumar R. TERT promoter mutations in telomere biology. *Mutation research*.  
355 2017;771:15-31.
- 356 5. Nagore E, Heidenreich B, Rachakonda S, Garcia-Casado Z, Requena C, Soriano V, et al.  
357 TERT promoter mutations in melanoma survival. *International journal of cancer*. 2016;139(1):75-84.
- 358 6. Reddel RR. The role of senescence and immortalization in carcinogenesis. *Carcinogenesis*.  
359 2000;21(3):477-84.
- 360 7. Horn S, Figl A, Rachakonda PS, Fischer C, Sucker A, Gast A, et al. TERT promoter  
361 mutations in familial and sporadic melanoma. *Science (New York, NY)*. 2013;339(6122):959-61.
- 362 8. Weinberg RA. *The Biology of Cancer*, 2nd Edition: Garland Science, Taylor & Francis  
363 Group, LLC; 2013.
- 364 9. Huang FW, Hodis E, Xu MJ, Kryukov GV, Chin L, Garraway LA. Highly recurrent TERT  
365 promoter mutations in human melanoma. *Science (New York, NY)*. 2013;339(6122):957-9.
- 366 10. Bell RJ, Rube HT, Xavier-Magalhaes A, Costa BM, Mancini A, Song JS, et al. Understanding  
367 TERT Promoter Mutations: A Common Path to Immortality. *Molecular cancer research : MCR*.  
368 2016;14(4):315-23.
- 369 11. Griewank KG, Murali R, Puig-Butille JA, Schilling B, Livingstone E, Potrony M, et al. TERT  
370 promoter mutation status as an independent prognostic factor in cutaneous melanoma. *Journal of the*  
371 *National Cancer Institute*. 2014;106(9).
- 372 12. Liu X, Bishop J, Shan Y, Pai S, Liu D, Murugan AK, et al. Highly prevalent TERT promoter  
373 mutations in aggressive thyroid cancers. *Endocrine-related cancer*. 2013;20(4):603-10.
- 374 13. Lee CJ, Evans J, Kim K, Chae H, Kim S. Determining the effect of DNA methylation on gene  
375 expression in cancer cells. *Methods in molecular biology* (Clifton, NJ). 2014;1101:161-78.
- 376 14. Razin A, Cedar H. DNA methylation and gene expression. *Microbiological reviews*.  
377 1991;55(3):451-8.
- 378 15. Jjingo D, Conley AB, Yi SV, Lunyak VV, Jordan IK. On the presence and role of human  
379 gene-body DNA methylation. *Oncotarget*. 2012;3(4):462-74.
- 380 16. Renaud S, Loukinov D, Abdullaev Z, Guilleret I, Bosman FT, Lobanenkov V, et al. Dual role  
381 of DNA methylation inside and outside of CTCF-binding regions in the transcriptional regulation of  
382 the telomerase hTERT gene. *Nucleic acids research*. 2007;35(4):1245-56.
- 383 17. Song SH, Kim TY. CTCF, Cohesin, and Chromatin in Human Cancer. *Genomics &*  
384 *informatics*. 2017;15(4):114-22.
- 385 18. Xu M, Katzenellenbogen RA, Grandori C, Galloway DA. An unbiased in vivo screen reveals  
386 multiple transcription factors that control HPV E6-regulated hTERT in keratinocytes. *Virology*.  
387 2013;446(1-2):17-24.
- 388 19. Lee DD, Leao R, Komosa M, Gallo M, Zhang CH, Lipman T, et al. DNA hypermethylation  
389 within TERT promoter upregulates TERT expression in cancer. *The Journal of clinical investigation*.  
390 2019;129(4):1801.
- 391 20. Castelo-Branco P, Choufani S, Mack S, Gallagher D, Zhang C, Lipman T, et al. Methylation  
392 of the TERT promoter and risk stratification of childhood brain tumours: an integrative genomic and  
393 molecular study. *The Lancet Oncology*. 2013;14(6):534-42.
- 394 21. Liu T, Yuan X, Xu D. Cancer-Specific Telomerase Reverse Transcriptase (TERT) Promoter  
395 Mutations: Biological and Clinical Implications. *Genes*. 2016;7(7).
- 396 22. Li G, Reinberg D. Chromatin higher-order structures and gene regulation. *Current opinion in*  
397 *genetics & development*. 2011;21(2):175-86.

- 398 23. Zhu J, Zhao Y, Wang S. Chromatin and epigenetic regulation of the telomerase reverse  
399 transcriptase gene. *Protein & cell*. 2010;1(1):22-32.
- 400 24. Nell RJ, Steenderen Dv, Menger NV, Weitering TJ, Versluis M, van der Velden PA.  
401 Quantification of DNA methylation using methylation-sensitive restriction enzymes and multiplex  
402 digital PCR. 2019;816744.
- 403 25. Stern JL, Paucek RD, Huang FW, Ghandi M, Nwumeh R, Costello JC, et al. Allele-Specific  
404 DNA Methylation and Its Interplay with Repressive Histone Marks at Promoter-Mutant TERT Genes.  
405 *Cell reports*. 2017;21(13):3700-7.
- 406 26. Huang FW, Bielski CM, Rinne ML, Hahn WC, Sellers WR, Stegmeier F, et al. TERT  
407 promoter mutations and monoallelic activation of TERT in cancer. *Oncogenesis*. 2015;4:e176.
- 408 27. El Ghalbzouri A, Commandeur S, Rietveld MH, Mulder AA, Willemze R. Replacement of  
409 animal-derived collagen matrix by human fibroblast-derived dermal matrix for human skin equivalent  
410 products. *Biomaterials*. 2009;30(1):71-8.
- 411 28. Gao L, Smit MA, van den Oord JJ, Goeman JJ, Verdegaal EM, van der Burg SH, et al.  
412 Genome-wide promoter methylation analysis identifies epigenetic silencing of MAPK13 in primary  
413 cutaneous melanoma. *Pigment cell & melanoma research*. 2013;26(4):542-54.
- 414 29. McEvoy AC, Calapre L, Pereira MR, Giardina T, Robinson C, Khattak MA, et al. Sensitive  
415 droplet digital PCR method for detection of TERT promoter mutations in cell free DNA from patients  
416 with metastatic melanoma. *Oncotarget*. 2017;8(45):78890-900.
- 417 30. Corless BC, Chang GA, Cooper S, Syeda MM, Shao Y, Osman I, et al. Development of  
418 Novel Mutation-Specific Droplet Digital PCR Assays Detecting TERT Promoter Mutations in Tumor  
419 and Plasma Samples. *The Journal of molecular diagnostics : JMD*. 2019;21(2):274-85.

## 420 **Figures**

421 **Fig 1. Methylation fraction (MF) of 31 CpG sites around cg11625005 in 35 primary skin**  
422 **samples and 9 cutaneous and uveal melanoma cell lines.** DNA samples were bisulfite-  
423 converted (BC) and analysed through NGS-based deep sequencing. Connected scatter plot  
424 representing the MF per cell type group in absolute distance between measured CpG sites.  
425 Blue arrow: cg11625005 (position 1,295,737).

426 **Fig 2. Methylation fraction (MF) analysed through ddPCR.** MF was plotted through  
427 RoodCom WebAnalysis (version 1.4.2., Rogier J. Nell, Leiden). MDNA and UDNA are  
428 commercially available methylated and unmethylated DNA. **A.** Calibration curve using  
429 different expected ratios (25%, 50% and 75%) of methylated DNA and F332 to demonstrate  
430 the quantitative capacity of ddPCR. **B.** MF of cg11625005 in a subset of healthy primary skin  
431 samples – fibroblasts (F332 and F537) and keratinocytes (K060 and K409) and cutaneous  
432 melanoma cell lines (A375, 94.07 and 518A2) incubated with MSRE HgaI. **C & D.**  
433 Correlation plots between MF obtained through golden standard NGS-based deep bisulfite  
434 sequencing versus ddPCR using either the MSRE HgaI (**C.**) or AvaI (**D.**), which digest  
435 unmethylated CpG in position 1,295,737 and 1,295,731, respectively.

436 **Fig 3.** Correlation between methylation fraction (%) and *TERT* mRNA expression in total of  
437 31 samples.

438 **Fig 4. *TERT* mutational status of primary skin samples and cutaneous melanoma cell**  
439 **lines.** **A.** The *TERT* region encompassing the C228T and C250T mutations was sequenced  
440 through Sanger sequencing using McEvoy's (McEvoy et al., 2017) *TERT* forward primer.  
441 The *TERT* region of fresh skin 1, Naevus 1, 518A2, 607B, A375, 94.07, 93.08 is shown.  
442 The left and right arrows respectively indicate the positions 1,295,228 and 1,295,250. R: one-  
443 letter code for bases G or A; Green arrow: wild-type; red arrow: C>T mutation on the  
444 complementary strand. **B.** Evaluation of *TERT* mutations through commercial Bio-Rad  
445 *TERT* assays in 518A2, 607B and A375 melanoma cell lines. 2D ddPCR plots of the results from  
446 the C228T mutation assay (left) and C250T mutation assay (right). The blue cloud represents mutant  
447 copies; the green cloud represents WT copies.

448 **Fig 5.** Correlation between *TERT* mutational status and *TERT* mRNA expression in total of  
449 31 samples.

450 **Fig 6. Accessibility of *TERT*<sub>p</sub> around cg11625005 in 8 melanoma cell lines.** Cell lines  
451 were analysed with the EpiQ chromatin kit, and ddPCR was performed using primers and  
452 probes for positive control gene *GAPDH* and for the *TERT* methylation region, a 231-bp  
453 amplicon around cg11625005. Accessibility (%) was calculated by the ratio of the digested  
454 sample to its matched undigested sample, subtracted from 1, and subsequently normalised  
455 against the positive control *GAPDH*. **A.** Accessibility of *GAPDH* and the *TERT* methylation  
456 region, normalised against *GAPDH*. **B & C.** Correlation plots of gene accessibility around  
457 cg11625005 with the MF (%) of cg11625005 obtained through ddPCR (**B**), or with  
458 normalised expression levels via qPCR (**C**). **D.** Correlation plot between MF (%) of  
459 cg11625005 obtained through ddPCR and normalised expression levels via qPCR **E.**  
460 Comparison of WT (OMM2.5, Mel270 and OCM8) and mutated (518A2, 607B, 94.07,  
461 A375, 93.08) *TERT*-expressing cell lines subsets regarding chromatin accessibility. **F.**  
462 Mutational fractional abundance (%) in a subset of 4 *TERT*<sub>p</sub>-mutated cutaneous cell lines  
463 before and after digestion by nuclease compared to the expression.

464 **Fig 7. Results overview.** **A.** Schematic representation of *TERT*<sub>p</sub> with the relative positions of  
465 cg11625005 (position 1,295,737 in hg19) to the *TERT*<sub>p</sub> mutations (position 1,295,228 and  
466 1,295,250) and the transcription start site (TSS). **B.** Heat-map of methylation fraction (MF) in  
467 31 CpG sites (top) in 44 samples (left). Yellow-marked CpG cg11625005 (position  
468 1,295,737) is recognised by MSRE HgaI. Blue-marked CpG in 1,295,731 is recognised by  
469 MSRE AvaI. Black rectangle: MF at the cg11625005 measured either by NGS (clear squares,  
470 n=44) and by ddPCR (patterned squares, n=17; these samples were not included in the 44-  
471 sample batch subjected to NGS). **C.** *TERT* mRNA expression in 31 samples by qPCR  
472 analysed through the  $\Delta\Delta$ CT method in Bio-Rad CFX manager software (version 3.1, Bio-  
473 Rad). **D.** *TERT*<sub>p</sub> mutations evaluated through ddPCR with commercial *TERT* C250T and  
474 C228T Mutation Assays in total 61 samples. **E.** Analysis of the chromatin accessibility in 8  
475 cultured cell lines for *TERT* methylation region using *GAPDH* as a positive (constitutively  
476 expressed) control.

477 **Fig 8. Proposed model of *TERT* transcriptional regulation.** Regardless of MF at the  
478 *TERT*<sub>p</sub> methylation region, both keratinocytes and melanocytes do not show *TERT*  
479 expression. In *TERT*<sub>p</sub>-mutated cell lines, an intermediate MF positively correlated with  
480 chromatin accessibility, in combination with C228T/C250T *TERT* mutations allows monoallelic  
481 *TERT* expression. In *TERT*<sub>p</sub>-WT cell lines, the MF is close to 100% with a significantly higher  
482 chromatin accessibility leading to the highest expression levels.

## 483 **Supporting information**

484 **S1 Table.** Tailed primers used for amplification of 325-bp region in bisulfite-converted samples.

485 **S2 Table.** Primers and probe sequences to amplify the 106-bp amplicon in a novel design of a ddPCR  
486 assay to determine the methylation fraction.

487 **S3 Table.** Primers and probe sequences to amplify the 231-bp region encompassing 31 CpG sites  
488 around the cg11625005 in a novel ddPCR assay to assess the chromatin state.

489 **S4 Table.** Primer and probe sequences for *TERT* expression in qPCR.

490 **S5 Table.** Overview of the methylation fraction (measured by ddPCR and NGS), mutational status  
491 and *TERT* mRNA expression of our sample cohort (n=61).

492 **S6 Table.** Overview of the methylation fraction (measured by ddPCR and NGS), mutational status  
493 and *TERT* mRNA expression and chromatin accessibility in the subset of melanoma cell lines present  
494 of our cohort (n=25).

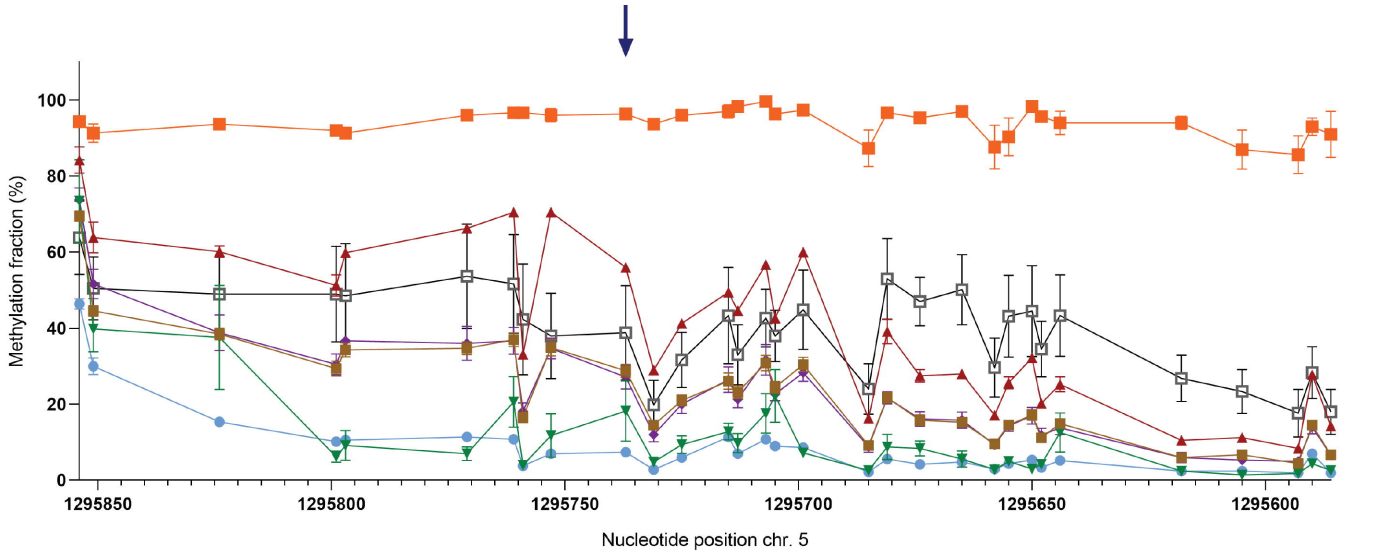

- Normal skin
- ▲ Keratinocytes
- Fibroblasts
- ▼ Melanocytes
- ◆ Naevi
- Uveal melanoma cell lines
- Cutaneous melanoma cell lines

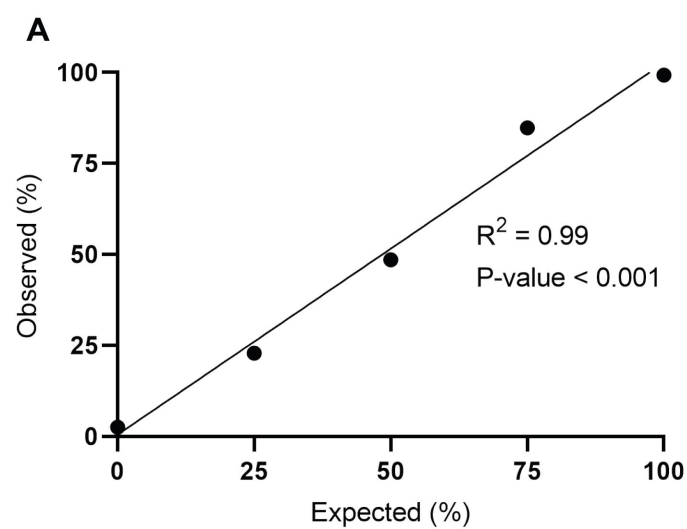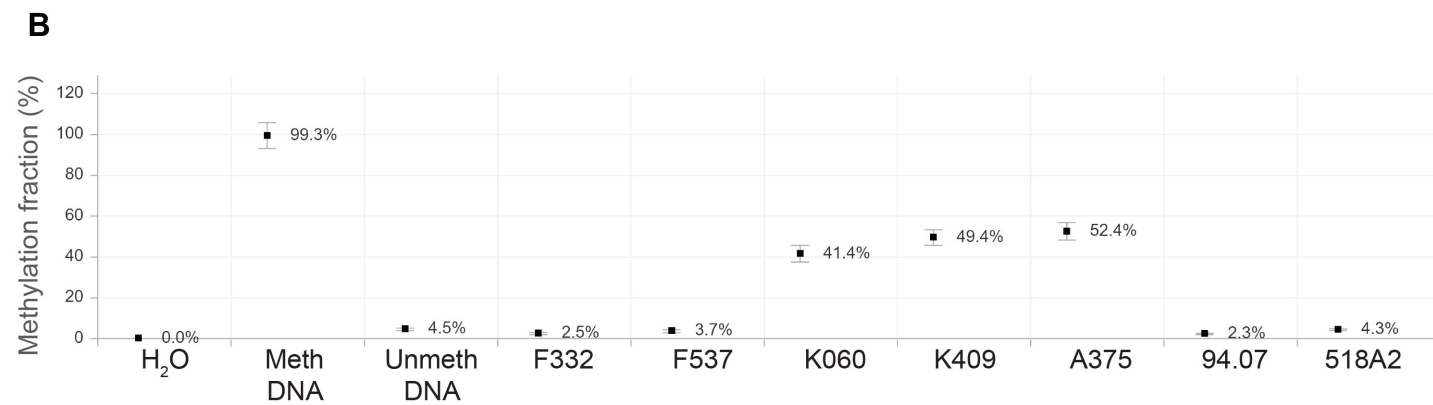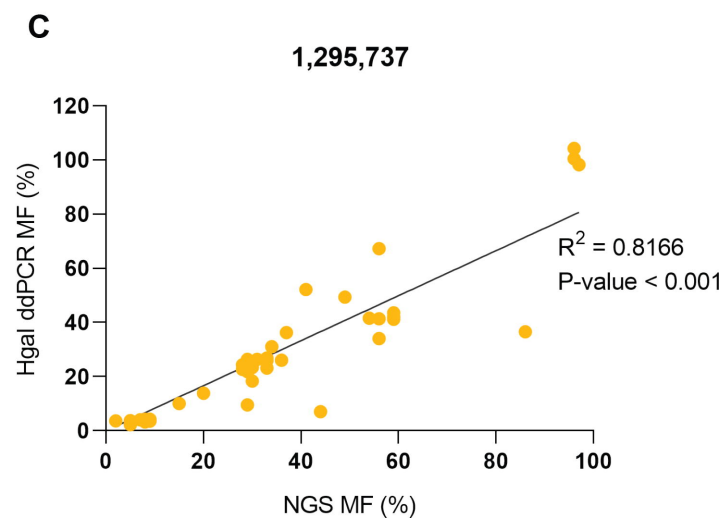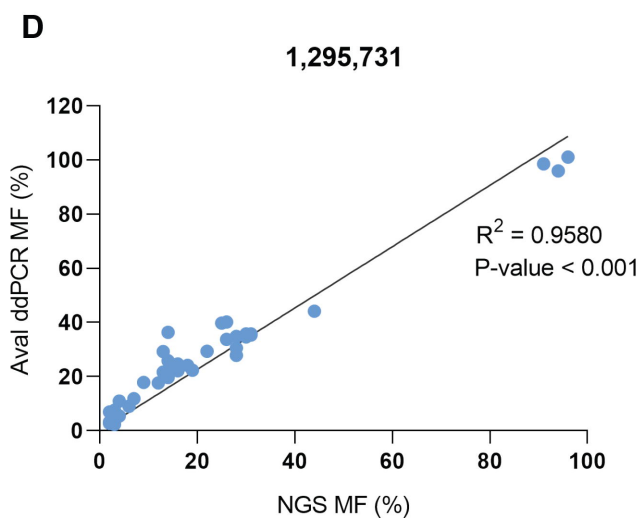

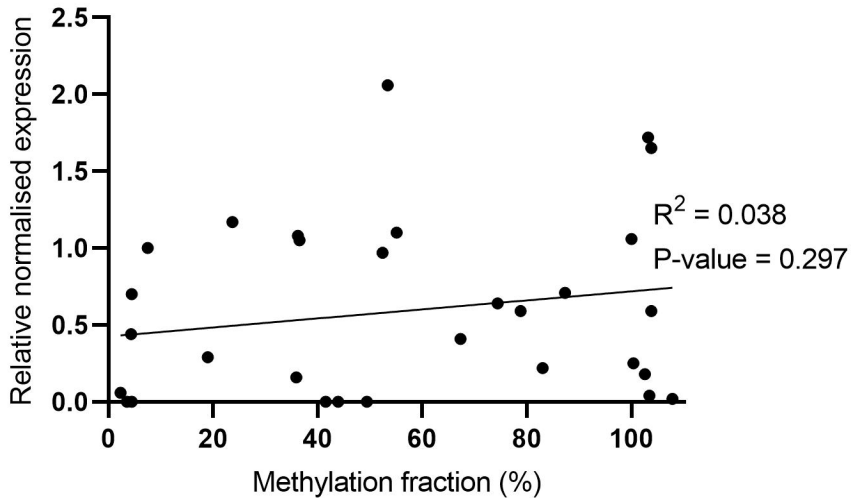



**A**

C228T

C250T

C228T

C250T

Fresh skin 1

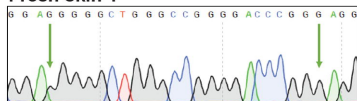

A375

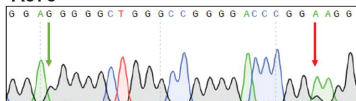

Naevus 1

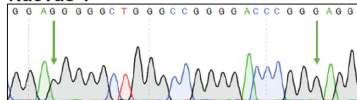

94.07

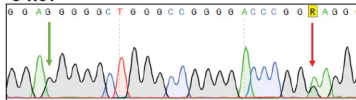

518A2

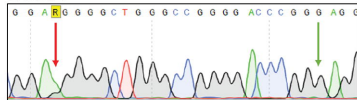

93.08

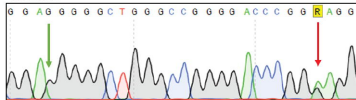

607B

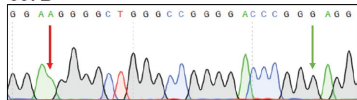**B***TERT* C228T\_113 Assay*TERT* C250T\_113 Assay

518A2

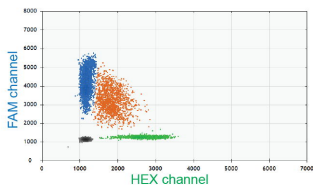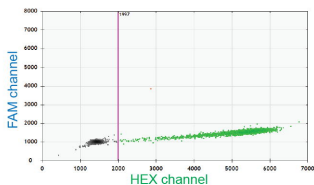

607B

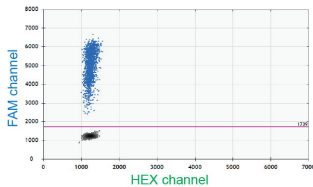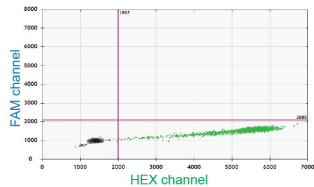

A375

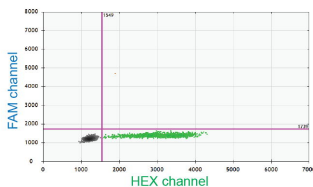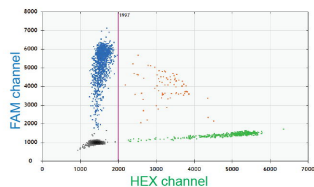



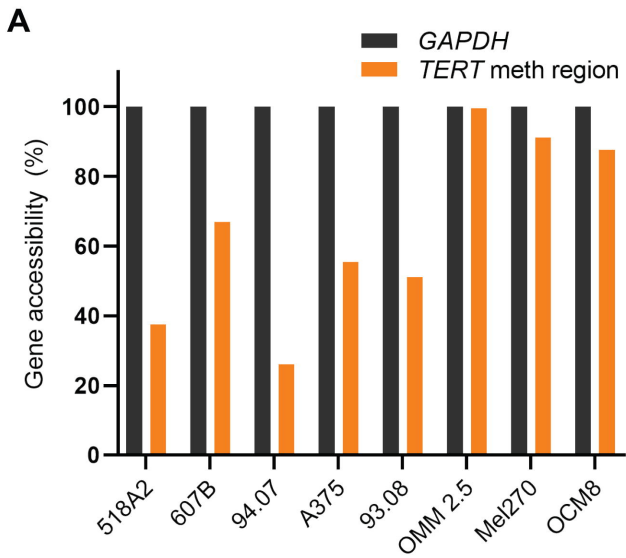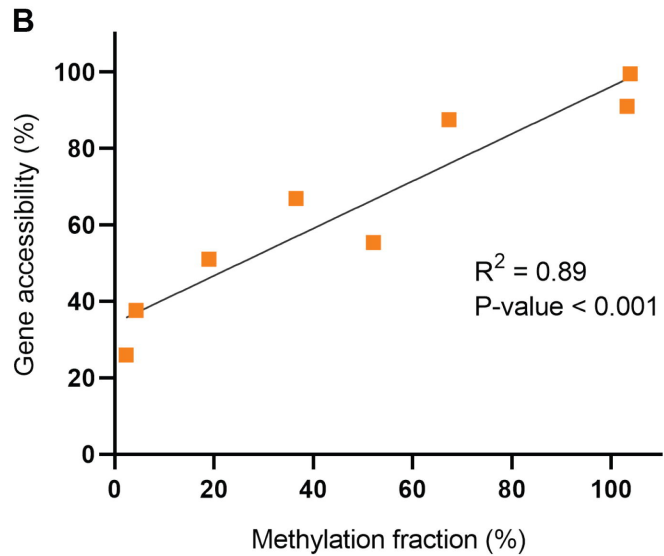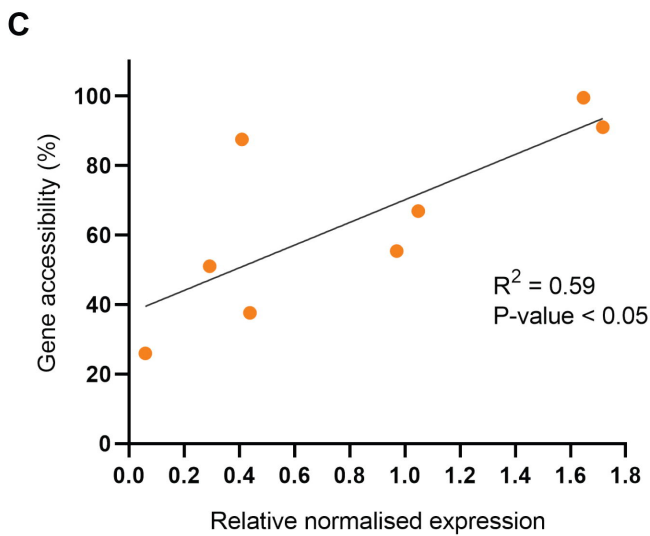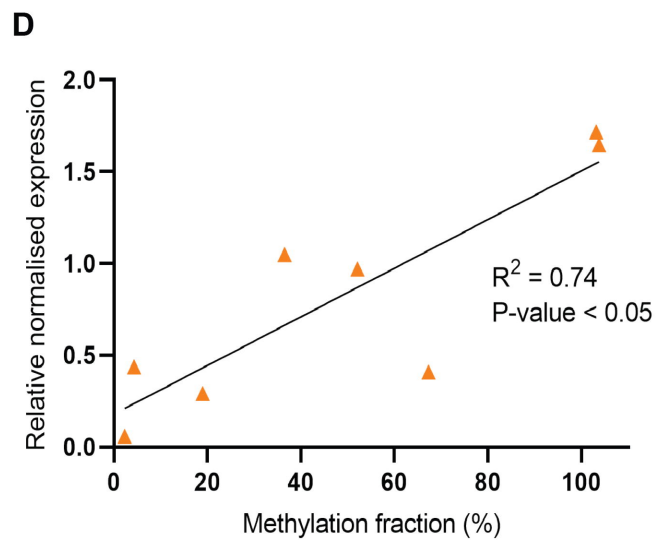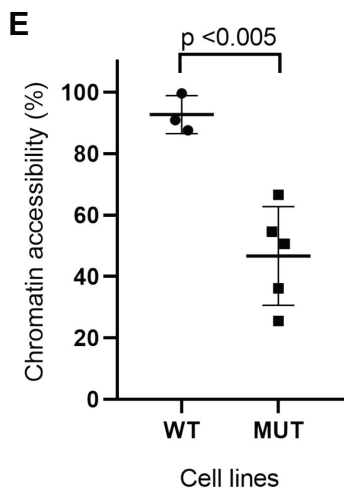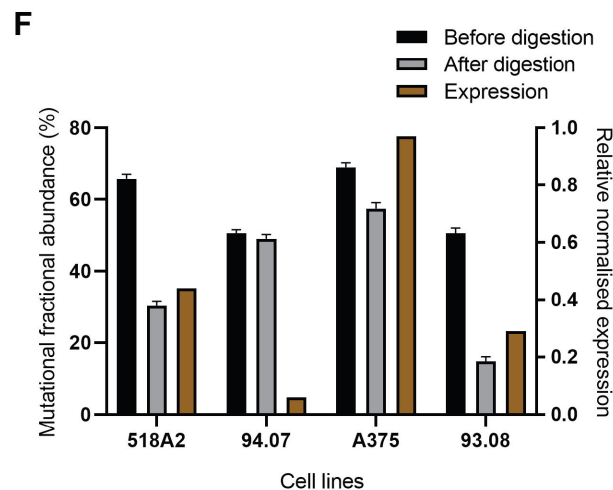



*TERT*  
5p15.33

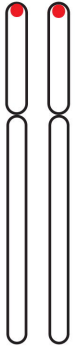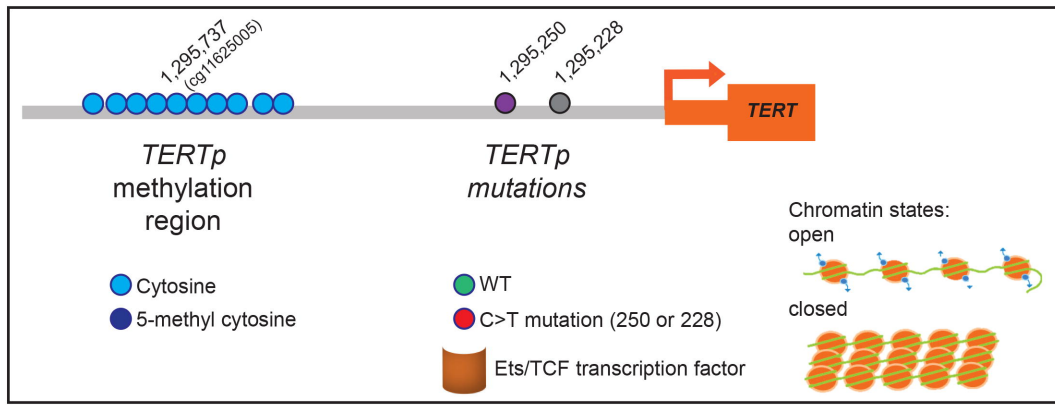

Keratinocytes

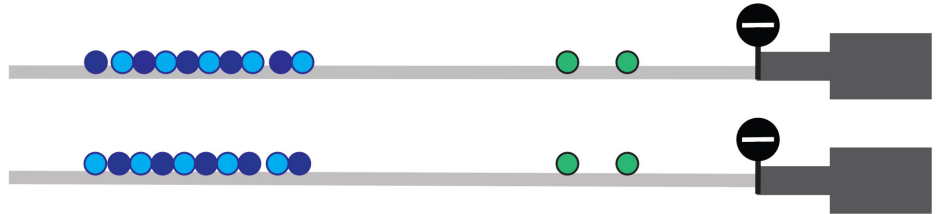

Melanocytes

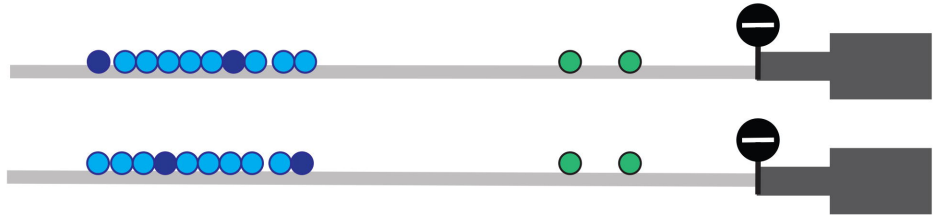

*TERT*<sub>p</sub>-mutated cell lines

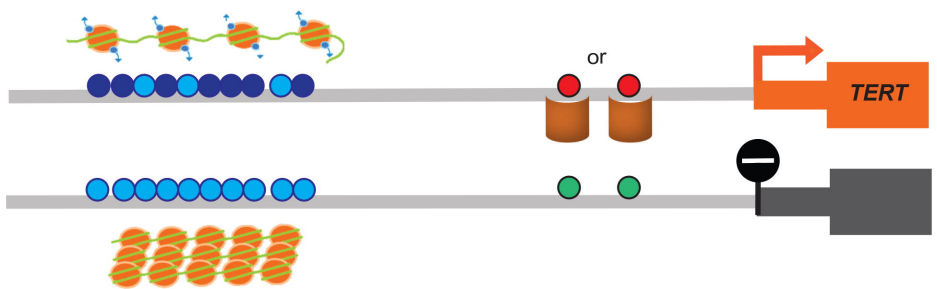

*TERT*<sub>p</sub>-WT cell lines

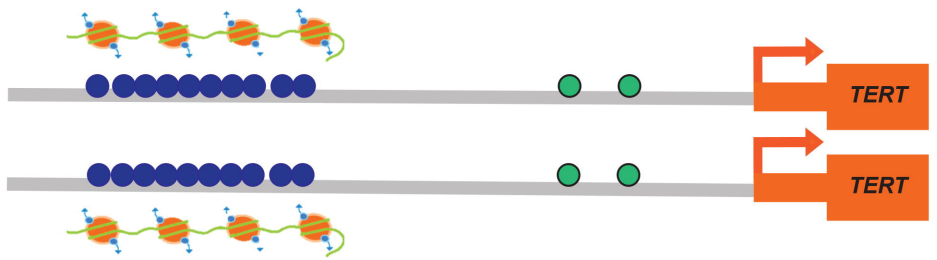

Source: https://www.biorxiv.org/content/10.1101/859892v1.full.pdf
